# Supplementary material for: Outcomes of Multimodal Treatment in Elderly Patients with Localized Non-Small Lung Cancer from a Radiation Oncology Point of View: Special Focus on Low-Dose Cisplatin
Source: MDPI journal article supplement (doi:10.3390/cancers16020327), 2024-01-11
Supplement: s1 [file s1]

**Table S3.** Prognostic factors in all eligible patients (total, n = 346, patients ≥70 years, n = 158, and patients <70 years, n = 188). Univariable Cox regression analysis. OS—overall survival. PFS—progression-free survival. LPFS—locoregional progression-free survival. DPFS—distant progression-free survival. HR—hazard ratio. CI—confidence interval. RT—radiotherapy.

| Parameter<br>(numbers of patients)                                                  | OS                  |         | PFS                 |         | LPFS                |         | DPFS                |         |
|-------------------------------------------------------------------------------------|---------------------|---------|---------------------|---------|---------------------|---------|---------------------|---------|
|                                                                                     | HR<br>(95% CI)      | p-value |
| <b>Gender</b><br>(female, 97; male, 249)                                            | 0.65<br>(0.48-0.87) | <0.01   | 0.63<br>(0.48-0.82) | <0.01   | 0.60<br>(0.45-0.79) | <0.01   | 0.69<br>(0.52-0.91) | <0.01   |
| <b>Age</b> (≥70 years, n=158,<br><70 years, n=188)                                  | 1.44<br>(1.11-1.85) | <0.01   | 1.09<br>(0.86-1.37) | 0.49    | 1.20<br>(0.95-1.52) | 0.13    | 1.17<br>(0.92-1.49) | 0.2     |
| <b>Karnofsky Index</b> , median=90,<br>≥median (187) vs. <median (159)              | 0.67<br>(0.52-0.86) | <0.01   | 0.74<br>(0.59-0.93) | 0.01    | 0.72<br>(0.57-0.92) | <0.01   | 0.74<br>(0.58-0.95) | 0.02    |
| <b>Charlson Comorbidity Index</b> ,<br>median=6, ≥median (208) vs.<br><median (138) | 1.45<br>(1.11-1.90) | <0.01   | 1.12<br>(0.88-1.42) | 0.36    | 1.23<br>(0.96-1.57) | 0.10    | 1.18<br>(0.92-1.53) | 0.19    |
| <b>T stage</b><br>(T0-2, 112; T3-4, 234)                                            | 1.43<br>(1.08-1.89) | 0.01    | 1.38<br>(1.07-1.77) | 0.01    | 1.33<br>(1.03-1.72) | 0.03    | 1.36<br>(1.05-1.77) | 0.02    |
| <b>N stage</b><br>(N0-1, 90; N2-3, 256)                                             | 1.19<br>(0.88-1.60) | 0.26    | 1.20<br>(0.92-1.56) | 0.19    | 1.20<br>(0.91-1.57) | 0.20    | 1.24<br>(0.94-1.65) | 0.13    |
| <b>Histology</b> (adenocarcinoma, 131;<br>other histology, 215)                     | 0.78<br>(0.59-1.01) | 0.06    | 0.81<br>(0.64-1.03) | 0.09    | 0.75<br>(0.59-0.96) | 0.02    | 0.87<br>(0.67-1.11) | 0.25    |
| <b>Treatment concept</b>                                                            |                     |         |                     |         |                     |         |                     |         |
| <b>RT only (63) vs.</b><br><b>bimodality therapy (254)</b>                          | 1.48<br>(1.08-2.04) | 0.01    | 1.25<br>(0.94-1.67) | 0.13    | 1.34<br>(1.0-1.80)  | 0.051   | 1.23<br>(0.95-1.73) | 0.11    |
| <b>RT only (63) vs.</b><br><b>trimodality therapy (29)</b>                          | 3.95<br>(2.15-7.27) | <0.01   | 4.36<br>(2.46-7.71) | <0.01   | 4.51<br>(2.54-8.02) | <0.01   | 4.09<br>(2.26-7.40) | <0.01   |
| <b>RT only (63) vs.</b><br><b>bi- and trimodality therapy (283)</b>                 | 1.74<br>(1.27-2.37) | <0.01   | 1.51<br>(1.13-2.02) | <0.01   | 1.63<br>(1.22-2.18) | <0.01   | 1.52<br>(1.13-2.05) | <0.01   |
| <b>Bimodality therapy (254) vs.</b><br><b>trimodality therapy (29)</b>              | 0.37<br>(0.22-0.64) | <0.01   | 0.32<br>(0.20-0.52) | <0.01   | 0.33<br>(0.20-0.54) | <0.01   | 0.33<br>(0.19-0.55) | <0.01   |
| <b>RT, applied dose,</b><br><b>&gt;60 Gy (135) vs. ≤ 60 Gy (211)</b>                | 0.82<br>(0.63-1.07) | 0.14    | 0.84<br>(0.66-1.06) | 0.15    | 0.88<br>(0.69-1.12) | 0.30    | 0.80<br>(0.63-1.03) | 0.08    |
