# Supplementary material for: Outcomes of Multimodal Treatment in Elderly Patients with Localized Non-Small Lung Cancer from a Radiation Oncology Point of View: Special Focus on Low-Dose Cisplatin
Source: MDPI journal article supplement (doi:10.3390/cancers16020327), 2024-01-11
Supplement: s1 [file s1]

**Table S4.** Prognostic factors in all eligible patients (total, n = 346, patients ≥70 years, n = 158, and patients <70 years, n = 188). Multivariable Cox regression analysis. OS—overall survival. PFS—progression-free survival. LPFS—locoregional progression-free survival. DPFS—distant progression-free survival. HR—hazard ratio. CI—confidence interval. RT—radiotherapy.

| Parameter<br>(numbers of patients)                                                  | OS                  |         | PFS                 |         | LPFS                |         | DPFS                |         |
|-------------------------------------------------------------------------------------|---------------------|---------|---------------------|---------|---------------------|---------|---------------------|---------|
|                                                                                     | HR<br>(95% CI)      | p-value |
| <b>Gender</b><br>(female, 97; male, 249)                                            | 0.71<br>(0.52-0.96) | 0.03    | 0.66<br>(0.50-0.87) | <0.01   | 0.64<br>(0.48-0.84) | <0.01   | 0.73<br>(0.55-0.96) | 0.03    |
| <b>Age</b> (≥70 years, n=158,<br><70 years, n=188)                                  | 1.35<br>(1.04-1.76) | 0.03    | 1.05<br>(0.80-1.39) | 0.72    | 1.12<br>(0.87-1.42) | 0.38    | 1.10<br>(0.86-1.42) | 0.44    |
| <b>Karnofsky Index</b> , median=90,<br>≥median (187) vs. <median (159)              | 0.71<br>(0.54-0.92) | <0.01   | 0.78<br>(0.62-1.00) | 0.046   | 0.77<br>(0.61-0.99) | 0.04    | 0.78<br>(0.61-1.00) | 0.047   |
| <b>Charlson Comorbidity Index</b> ,<br>median=6, ≥median (208) vs.<br><median (138) | 1.08<br>(0.78-1.51) | 0.64    | 0.96<br>(0.74-1.23) | 0.73    | 0.97<br>(0.71-1.31) | 0.82    | 0.98<br>(0.72-1.32) | 0.87    |
| <b>T stage</b><br>(T0-2, 112; T3-4, 234)                                            | 1.44<br>(1.09-1.91) | 0.01    | 1.35<br>(1.05-1.74) | 0.02    | 1.29<br>(1.00-1.67) | 0.05    | 1.35<br>(1.04-1.76) | 0.03    |
| <b>Histology</b> (adenocarcinoma, 131;<br>other histology, 215)                     | 0.92<br>(0.70-1.21) | 0.56    | 0.95<br>(0.74-1.22) | 0.70    | 0.86<br>(0.67-1.12) | 0.26    | 1.01<br>(0.78-1.31) | 0.95    |
| <b>Treatment concept</b> , RT only (63) vs.<br>bi- and trimodality therapy (283)    | 1.44<br>(1.03-2.00) | 0.03    | 1.37<br>(1.02-1.85) | 0.04    | 1.46<br>(1.08-1.97) | 0.01    | 1.41<br>(1.04-1.91) | 0.03    |
