# Supplementary material for: Outcomes of Multimodal Treatment in Elderly Patients with Localized Non-Small Lung Cancer from a Radiation Oncology Point of View: Special Focus on Low-Dose Cisplatin
Source: MDPI journal article supplement (doi:10.3390/cancers16020327), 2024-01-11
Supplement: s1 [file s1]

**Table S2.** Comparison of toxicities between patients who received definitive radiotherapy (RT) only, definitive radiochemotherapy with low-dose cisplatin, and definitive radiochemotherapy with cisplatin/vinorelbine. Here, Pearson's Chi-square test was used.

| Parameter                          | RT only, n=58 | Low-dose cisplatin,<br>n=125 | Cisplatin/<br>vinorelbine, n=76 | Comparison of RT<br>only vs. low-dose<br>cisplatin, p-value | Comparison of RT<br>only vs. cisplatin/<br>vinorelbine,<br>p-value |
|------------------------------------|---------------|------------------------------|---------------------------------|-------------------------------------------------------------|--------------------------------------------------------------------|
| Dermatitis, ≥grade 1               | 16 (27.6)     | 51 (40.8)                    | 31 (40.8)                       | 0.08                                                        | 0.11                                                               |
| Dermatitis, ≥grade 2               | 1 (1.7)       | 1 (0.8)                      | 0 (0.0)                         | 0.58                                                        | 0.25                                                               |
| Dysphagia, ≥grade 1                | 32 (55.2)     | 78 (62.4)                    | 51 (67.1)                       | 0.35                                                        | 0.16                                                               |
| Dysphagia, ≥grade 2                | 9 (15.5)      | 24 (19.2)                    | 24 (31.6)                       | 0.55                                                        | 0.03                                                               |
| Dysphagia, ≥grade 3                | 2 (3.4)       | 6 (4.8)                      | 11 (14.4)                       | 0.68                                                        | 0.03                                                               |
| Nausea, ≥grade 1                   | 11 (19.0)     | 33 (26.4)                    | 32 (42.1)                       | 0.27                                                        | <0.01                                                              |
| Nausea, ≥grade 2                   | 5 (8.6)       | 5 (4.0)                      | 12 (15.8)                       | 0.20                                                        | 0.22                                                               |
| Pneumonitis, ≥grade 1              | 16 (27.6)     | 33 (26.4)                    | 15 (19.7)                       | 0.87                                                        | 0.29                                                               |
| Pneumonitis, ≥grade 2              | 9 (15.5)      | 13 (10.4)                    | 4 (5.3)                         | 0.32                                                        | <0.05                                                              |
| Pneumonitis, ≥grade 3              | 3 (5.2)       | 2 (1.6)                      | 0 (0.0)                         | 0.17                                                        | 0.04                                                               |
| Lung infection,<br>≥grade 2        | 5 (8.6)       | 21 (16.8)                    | 11 (14.5)                       | 0.14                                                        | 0.30                                                               |
| Dyspnea, ≥grade 1                  | 44 (75.9)     | 79 (63.2)                    | 48 (63.2)                       | 0.09                                                        | 0.12                                                               |
| Dyspnea, ≥grade 2                  | 26 (44.9)     | 41 (32.8)                    | 22 (29.0)                       | 0.11                                                        | 0.06                                                               |
| Dyspnea, ≥grade 3                  | 16 (27.6)     | 20 (16.0)                    | 7 (9.2)                         | 0.07                                                        | <0.01                                                              |
| Myocardial infarction,<br>≥grade 2 | 3 (5.2)       | 2 (1.6)                      | 0 (0.0)                         | 0.17                                                        | 0.04                                                               |
| Anemia, ≥grade 1                   | 52 (89.7)     | 108 (86.4)                   | 67 (88.2)                       | 0.54                                                        | 0.79                                                               |
| Anemia, ≥grade 2                   | 22 (37.9)     | 34 (27.2)                    | 22 (28.9)                       | 0.14                                                        | 0.27                                                               |
| Anemia, ≥grade 3                   | 8 (13.8)      | 7 (5.6)                      | 7 (9.2)                         | 0.06                                                        | 0.40                                                               |
| Leukopenia, ≥grade 1               | 13 (22.4)     | 78 (62.4)                    | 58 (76.3)                       | <0.01                                                       | <0.01                                                              |
| Leukopenia, ≥grade 2               | 4 (6.9)       | 45 (36.0)                    | 47 (61.8)                       | <0.01                                                       | <0.01                                                              |
| Leukopenia, ≥grade 3               | 2 (3.4)       | 18 (14.4)                    | 31 (40.8)                       | 0.03                                                        | <0.01                                                              |
| Thrombocytopenia,<br>≥grade 1      | 15 (25.9)     | 69 (55.2)                    | 34 (44.7)                       | <0.01                                                       | 0.02                                                               |
| Thrombocytopenia,<br>≥grade 2      | 3 (5.2)       | 11 (8.8)                     | 9 (11.8)                        | 0.39                                                        | 0.20                                                               |
| Thrombocytopenia,<br>≥grade 3      | 2 (3.4)       | 2 (1.6)                      | 4 (5.3)                         | 0.43                                                        | 0.61                                                               |
