# Supplementary material for: Outcomes of Multimodal Treatment in Elderly Patients with Localized Non-Small Lung Cancer from a Radiation Oncology Point of View: Special Focus on Low-Dose Cisplatin
Source: MDPI journal article supplement (doi:10.3390/cancers16020327), 2024-01-11
Supplement: s1 [file s1]

**Table S6.** Survival (univariable Cox regression analysis) in patients who received definitive radiochemotherapy with cisplatin/vinorelbine vs. low-dose cisplatin (stratified by age). OS—overall survival. PFS—progression-free survival. LPFS—locoregional progression-free survival. DPFS—distant progression-free survival. HR—hazard ratio. CI—confidence interval. RT—radiotherapy.

| Parameter<br>(numbers of patients)                                                                                                | OS                  |         | PFS                 |         | LPFS                |         | DPFS                |         |
|-----------------------------------------------------------------------------------------------------------------------------------|---------------------|---------|---------------------|---------|---------------------|---------|---------------------|---------|
|                                                                                                                                   | HR<br>(95% CI)      | p-value |
| Cisplatin/vinorelbine vs. low-dose cisplatin, only patients <70 years<br>(125, cisplatin/vinorelbine, 58, low-dose cisplatin, 67) | 0.92<br>(0.58-1.46) | 0.73    | 0.97<br>(0.66-1.44) | 0.89    | 0.98<br>(0.65-1.48) | 0.93    | 0.93<br>(0.61-1.41) | 0.72    |
| Cisplatin/vinorelbine vs. low-dose cisplatin, only patients ≥70 years<br>(76, cisplatin/vinorelbine, 18, low-dose cisplatin, 58)  | 0.79<br>(0.42-1.51) | 0.48    | 0.76<br>(0.42-1.38) | 0.37    | 0.73<br>(0.40-1.32) | 0.30    | 0.72<br>(0.39-1.31) | 0.28    |
