# Supplementary material for: Outcomes of Multimodal Treatment in Elderly Patients with Localized Non-Small Lung Cancer from a Radiation Oncology Point of View: Special Focus on Low-Dose Cisplatin
Source: MDPI journal article supplement (doi:10.3390/cancers16020327), 2024-01-11
Supplement: s1 [file s1]

**Table S1.** Comparison of clinical and treatment characteristics between patients treated with definitive radiotherapy (RT) only, definitive radiochemotherapy with low-dose cisplatin, and definitive radiochemotherapy with cisplatin/vinorelbine. The statistical comparisons were performed with Chi-square test or Kruskal–Wallis test.

| Parameter                                                   | RT only, n=58      | Low-dose cisplatin,<br>n=125 | Cisplatin/<br>vinorelbine, n=76 | Comparison of RT<br>only vs. low-dose<br>cisplatin, p-value | Comparison of RT<br>only vs. cisplatin/<br>vinorelbine,<br>p-value |
|-------------------------------------------------------------|--------------------|------------------------------|---------------------------------|-------------------------------------------------------------|--------------------------------------------------------------------|
| Age (years, median<br>(min-max))                            | 77.1 (56.5 – 89.2) | 68.5 (32.5 – 85.0)           | 62.6 (39.2 – 77.8)              | <0.01                                                       | <0.01                                                              |
| Gender                                                      |                    |                              |                                 |                                                             |                                                                    |
| Male (number (%))                                           | 46 (79.3)          | 95 (76.0)                    | 55 (72.4)                       | 0.62                                                        | 0.36                                                               |
| Female (number<br>(%))                                      | 12 (20.7)          | 30 (24.0)                    | 21 (27.6)                       |                                                             |                                                                    |
| Follow-up<br>(months, median,<br>min-max)                   | 8.7 (1.5 – 58.1)   | 12.3 (1.5 – 149.7)           | 9.4 (1.2 – 60.4)                | 0.05                                                        | 0.36                                                               |
| Karnofsky index<br>(median, min-max)                        | 80 (50 – 90)       | 90 (50 – 90)                 | 90 (20 – 90)                    | <0.01                                                       | <0.01                                                              |
| Charlson<br>Comorbidity Index<br>(median, min-max)          | 7.5 (3-14)         | 6 (2-13)                     | 5 (2-9)                         | <0.01                                                       | <0.01                                                              |
| T stage 0-2,<br>numbers (%)                                 | 23 (39.7)          | 35 (28.0)                    | 25 (32.9)                       | 0.11                                                        | 0.42                                                               |
| T stage 3-4,<br>numbers (%)                                 | 35 (60.3)          | 90 (72.0)                    | 51 (67.1)                       |                                                             |                                                                    |
| N stage 0-1,<br>numbers (%)                                 | 16 (27.6)          | 33 (26.4)                    | 7 (9.2)                         | 0.87                                                        | 0.01                                                               |
| N stage 2-3,<br>numbers (%)                                 | 42 (72.4)          | 92 (73.6)                    | 69 (90.8)                       |                                                             |                                                                    |
| UICC stage IIB-IIIA,<br>numbers (%)                         | 32 (55.2)          | 51 (40.8)                    | 23 (30.2)                       | 0.07                                                        | 0.02                                                               |
| UICC stage IIIB-<br>IIIC, numbers (%)                       | 26 (44.8)          | 74 (59.2)                    | 53 (69.8)                       |                                                             |                                                                    |
| Radiotherapy,<br>applied dose [Gy]<br>(median, min-max)     | 60 (2 – 66)        | 60 (4 – 66.6)                | 65 (10 – 66)                    | 0.04                                                        | 0.02                                                               |
| Completion of<br>radiotherapy as<br>planned, numbers<br>(%) | 42 (72.4)          | 111 (88.8)                   | 60 (78.9)                       | <0.01                                                       | 0.38                                                               |
