# Supplementary material for: Outcomes of Multimodal Treatment in Elderly Patients with Localized Non-Small Lung Cancer from a Radiation Oncology Point of View: Special Focus on Low-Dose Cisplatin
Source: MDPI journal article supplement (doi:10.3390/cancers16020327), 2024-01-11
Supplement: s1 [file s1]

**Table S5.** Prognostic factors in elderly patients (≥70 years, n = 158). Univariable Cox regression analysis. OS—overall survival. PFS—progression-free survival. LPFS—locoregional progression-free survival. DPFS—distant progression-free survival. HR—hazard ratio. CI—confidence interval. RT—radiotherapy.

| Parameter<br>(numbers of patients)                                     | OS                     |         | PFS                    |         | LPFS                   |         | DPFS                   |         |
|------------------------------------------------------------------------|------------------------|---------|------------------------|---------|------------------------|---------|------------------------|---------|
|                                                                        | HR<br>(95% CI)         | p-value |
| <b>Gender</b><br>(female, 35; male, 123)                               | 0.53<br>(0.33 - 0.85)  | <0.01   | 0.54<br>(0.35 - 0.84)  | <0.01   | 0.55<br>(0.35 - 0.85)  | <0.01   | 0.54<br>(0.35 - 0.86)  | <0.01   |
| <b>T stage</b><br>(T0-2, 52; T3-4, 106)                                | 1.51<br>(1.02 - 2.23)  | 0.04    | 1.52<br>(1.05 - 2.19)  | 0.03    | 1.47<br>(1.02 - 2.13)  | 0.04    | 1.47<br>(1.01 - 2.14)  | <0.05   |
| <b>N stage</b><br>(N0-1, 48; N2-3, 110)                                | 0.92<br>(0.63 - 1.36)  | 0.68    | 0.97<br>(0.68 - 1.4)   | 0.88    | 0.99<br>(0.69 - 1.44)  | 0.97    | 0.94<br>(0.65 - 1.37)  | 0.76    |
| <b>Histology</b><br>(adenocarcinoma, 54; other<br>histology, 104)      | 0.67<br>(0.45 - 0.99)  | 0.04    | 0.64<br>(0.44 - 0.93)  | 0.02    | 0.62<br>(0.43 - 0.9)   | 0.01    | 0.68<br>(0.47 - 1)     | <0.05   |
| <b>Treatment concept</b>                                               |                        |         |                        |         |                        |         |                        |         |
| <b>RT only (48) vs.<br/>bimodality therapy (100)</b>                   | 1.55<br>(1.05 - 2.28)  | 0.03    | 1.53<br>(1.07 - 2.21)  | 0.02    | 1.53<br>(1.06 - 2.21)  | 0.02    | 1.41<br>(0.97 - 2.05)  | 0.07    |
| <b>RT only (48) vs.<br/>trimodality therapy (10)</b>                   | 7.8<br>(2.33 - 26.11)  | <0.01   | 7.57<br>(2.63 - 21.77) | <0.01   | 7.46<br>(2.59 - 21.49) | <0.01   | 5.98<br>(2.07 - 17.26) | <0.01   |
| <b>RT only (48) vs.<br/>bi- and trimodality therapy (110)</b>          | 1.78<br>(1.21 - 2.61)  | <0.01   | 1.78<br>(1.24 - 2.55)  | <0.01   | 1.77<br>(1.23 - 2.55)  | <0.01   | 1.62<br>(1.12 - 2.35)  | 0.01    |
| <b>Bimodality therapy (100) vs.<br/>trimodality therapy (10)</b>       | 3.86<br>(1.40 - 10.64) | <0.01   | 3.23<br>(1.39 - 7.51)  | <0.01   | 3.21<br>(1.38 - 7.46)  | <0.01   | 3.56<br>(1.42 - 8.90)  | <0.01   |
| <b>Karnofsky index,<br/>≥median (75) vs. &lt;median (83)</b>           | 0.57<br>(0.4 - 0.83)   | <0.01   | 0.63<br>(0.45 - 0.89)  | <0.01   | 0.6<br>(0.43 - 0.85)   | <0.01   | 0.6<br>(0.42 - 0.86)   | <0.01   |
| <b>Radiotherapy, applied dose,<br/>&gt;60 Gy (67) vs. ≤ 60 Gy (91)</b> | 0.77<br>(0.53 - 1.12)  | 0.18    | 0.76<br>(0.54 - 1.08)  | 0.13    | 0.81<br>(0.57 - 1.15)  | 0.24    | 0.72<br>(0.51 - 1.03)  | 0.07    |
